# Supplementary material for: Plasma kallikrein structure reveals apple domain disc rotated conformation compared to factor XI
Source: PubMed Central journal article supplement (PMC6899681; doi:10.1111/jth.14418), 2019-03-19

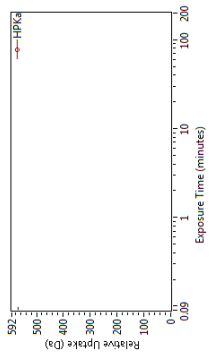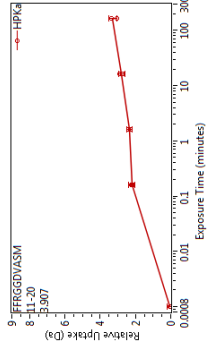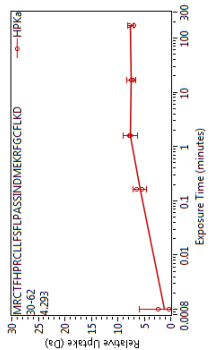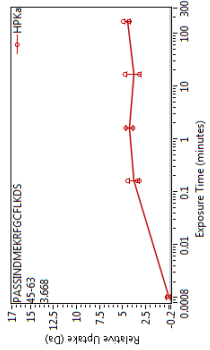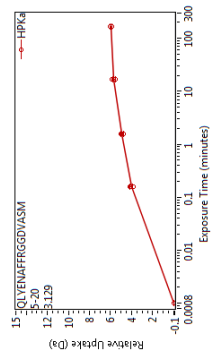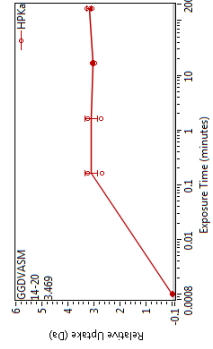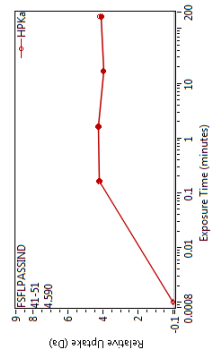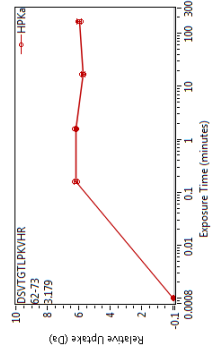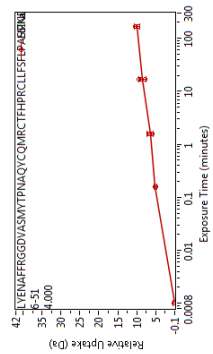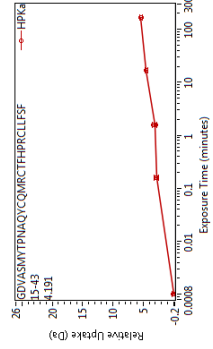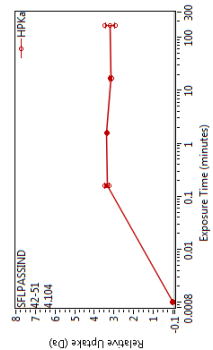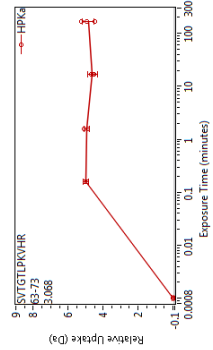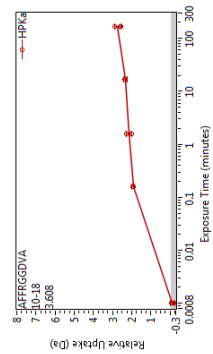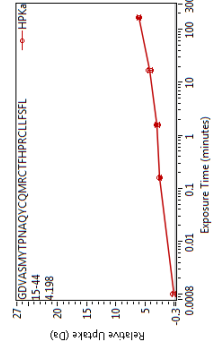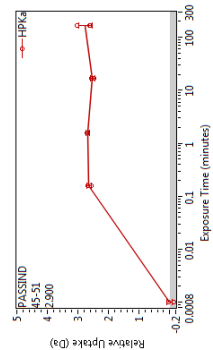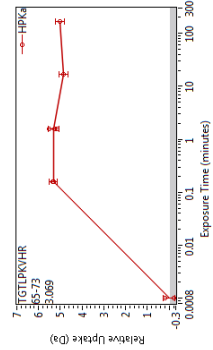

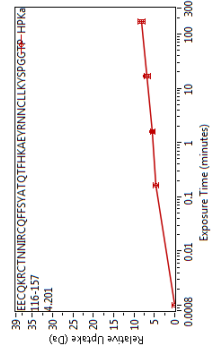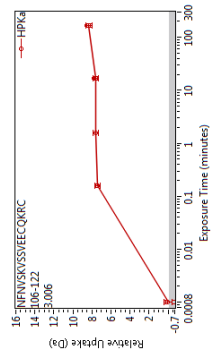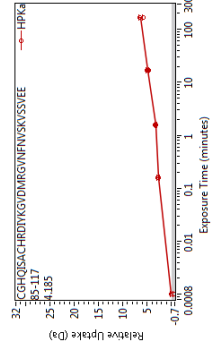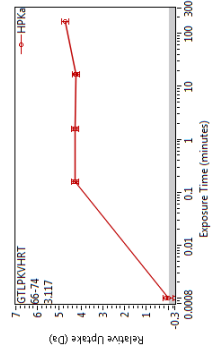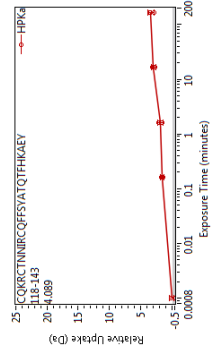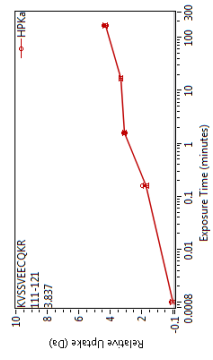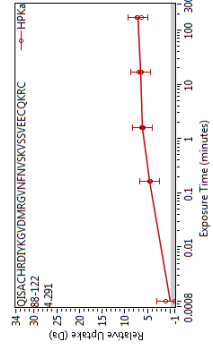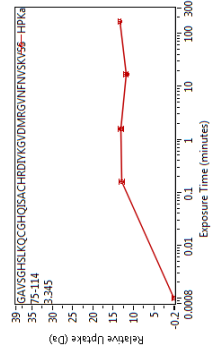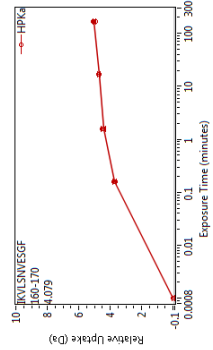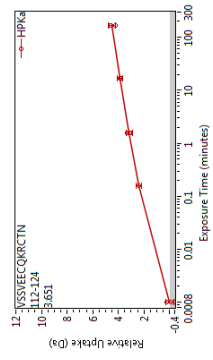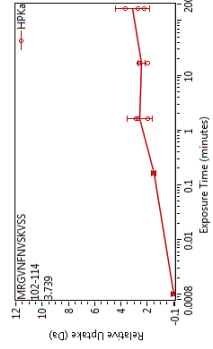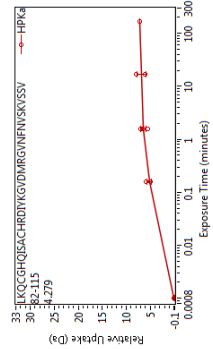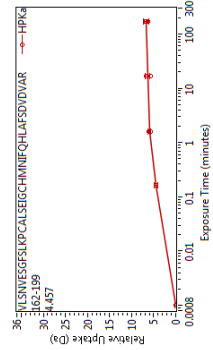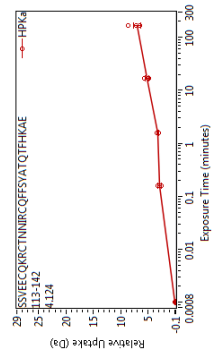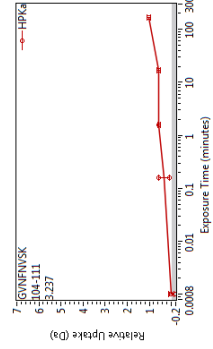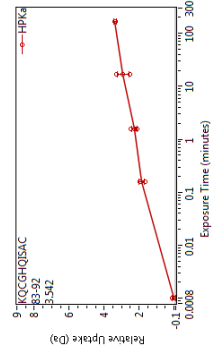

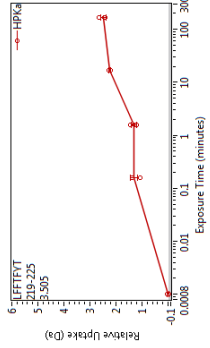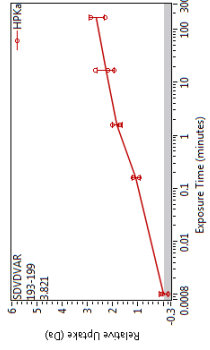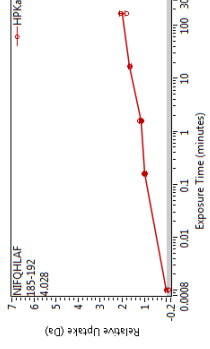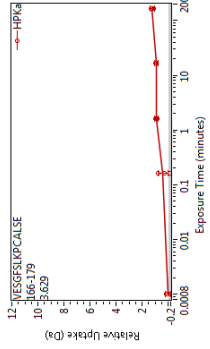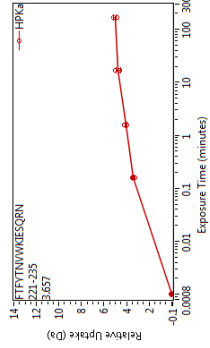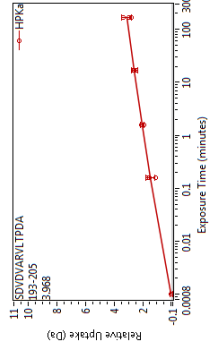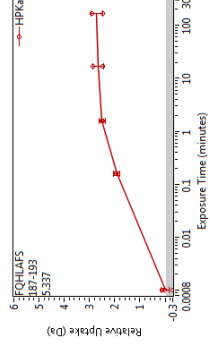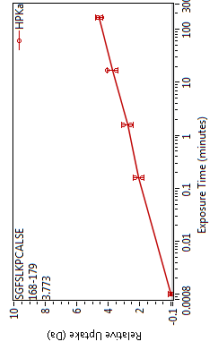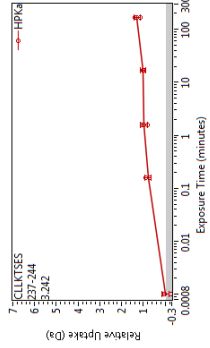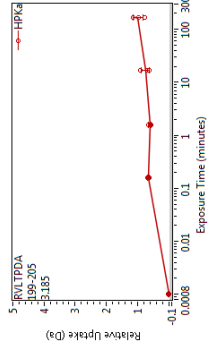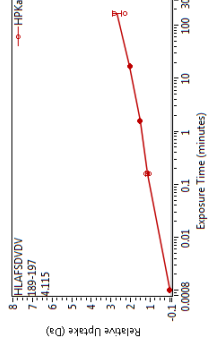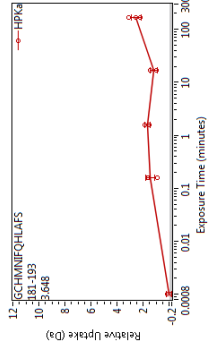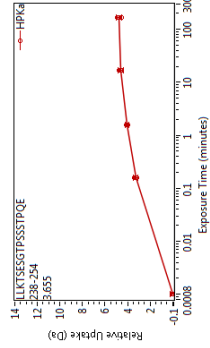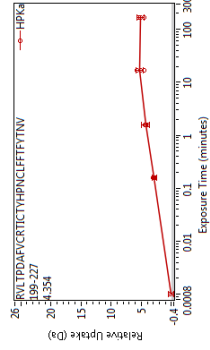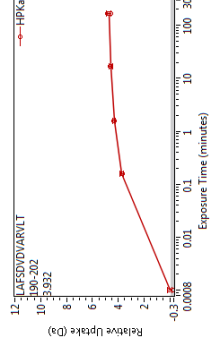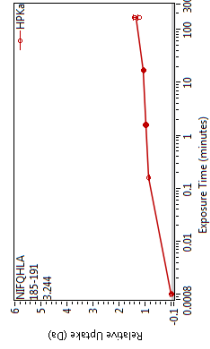

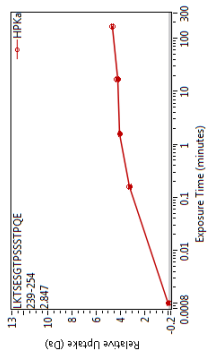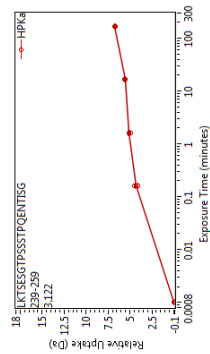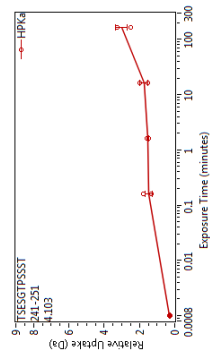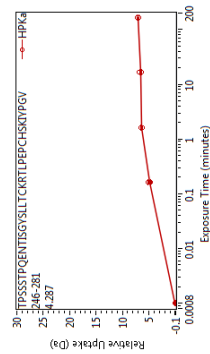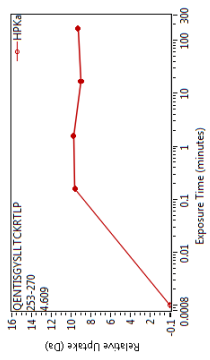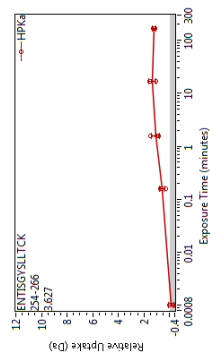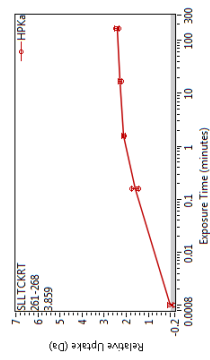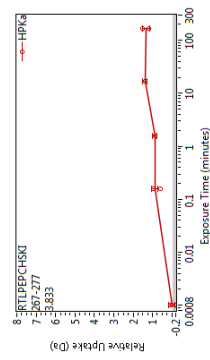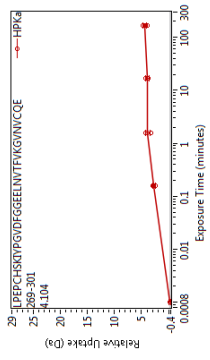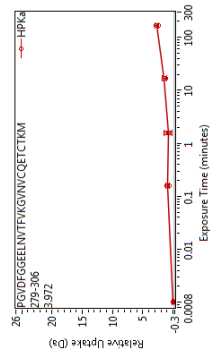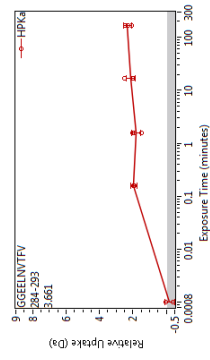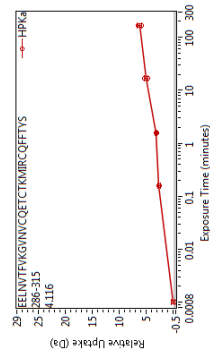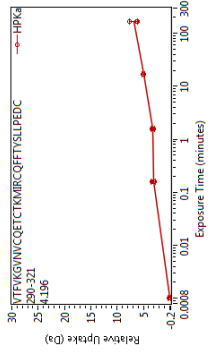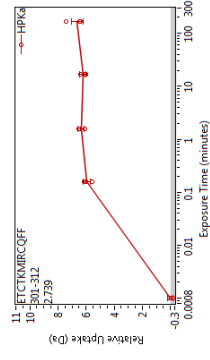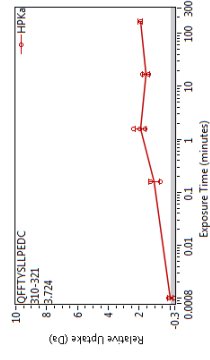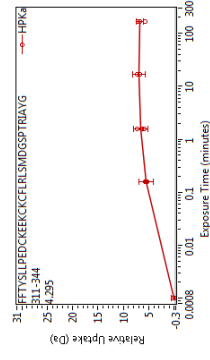

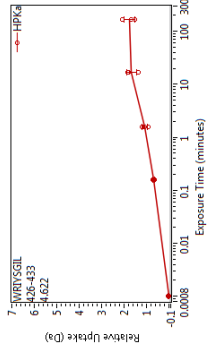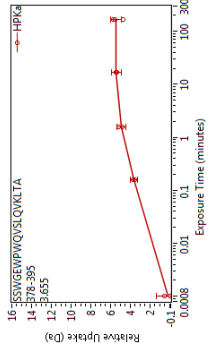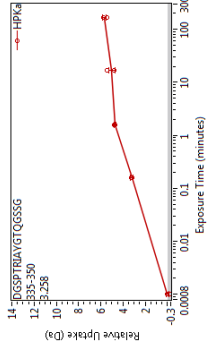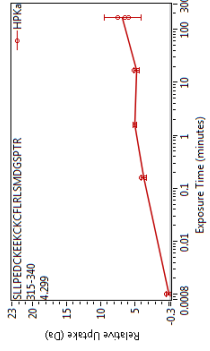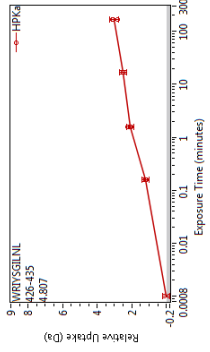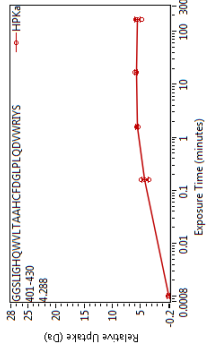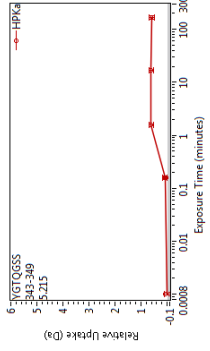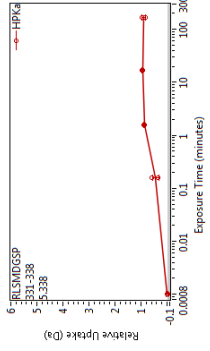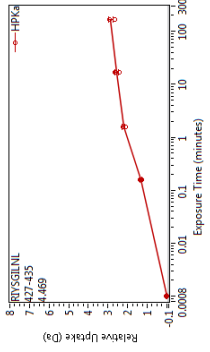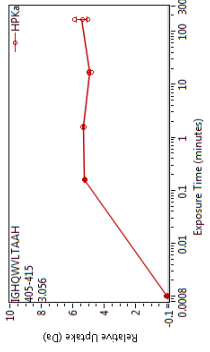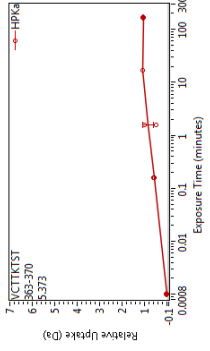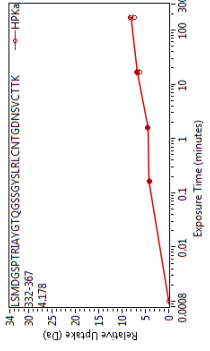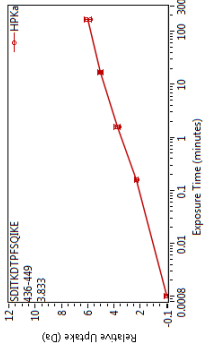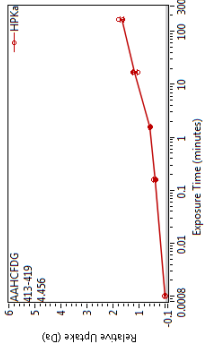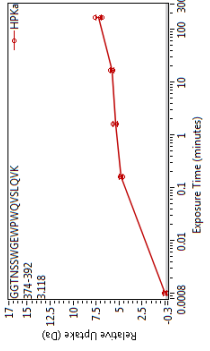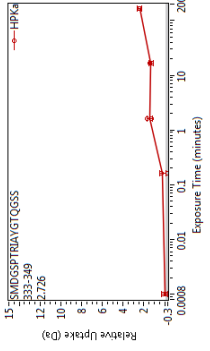

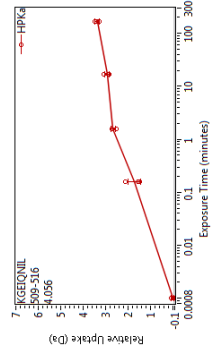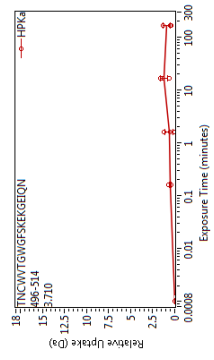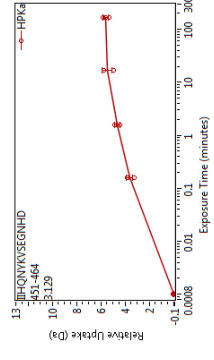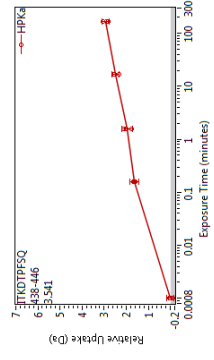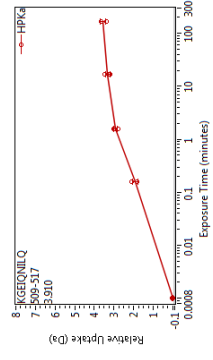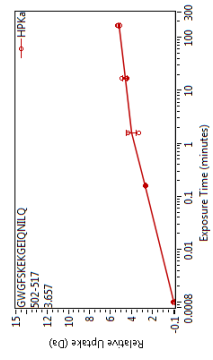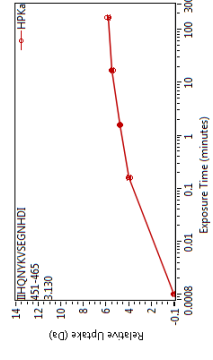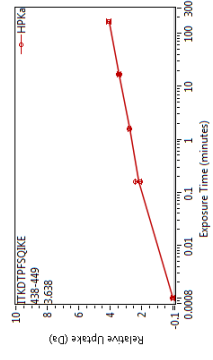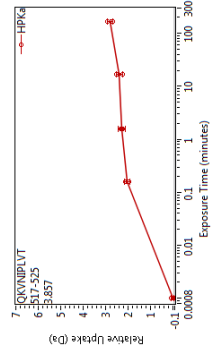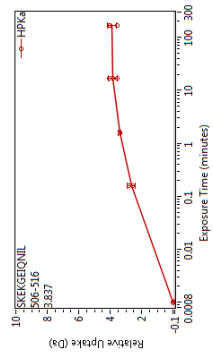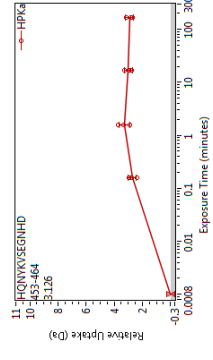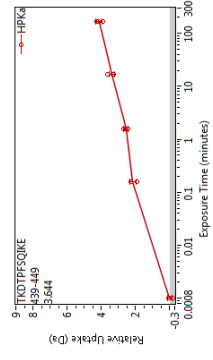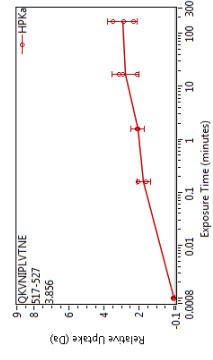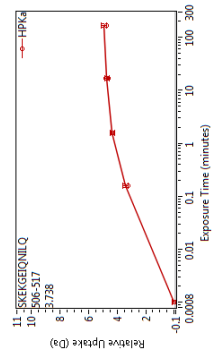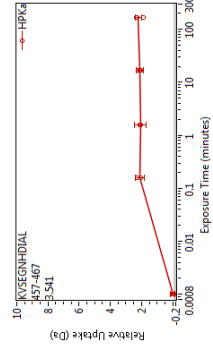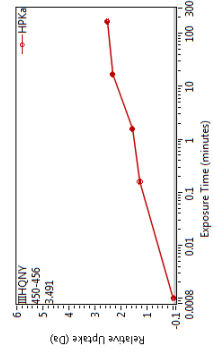

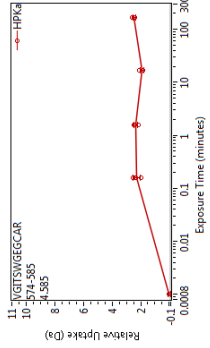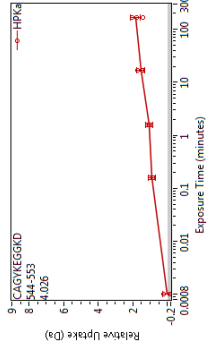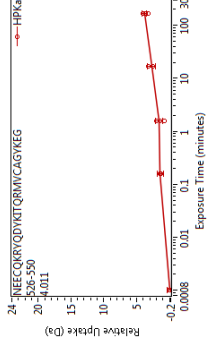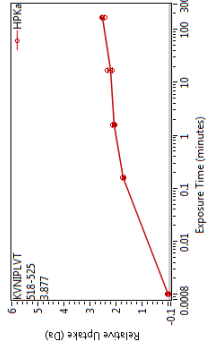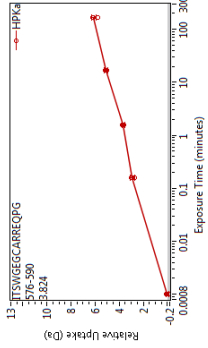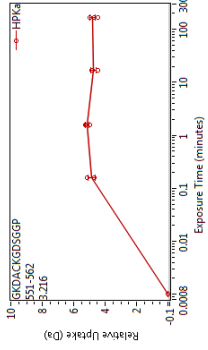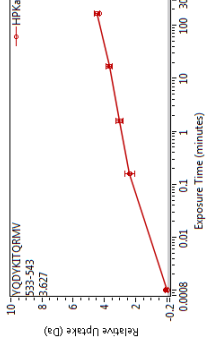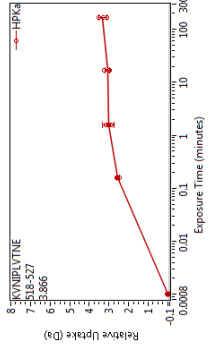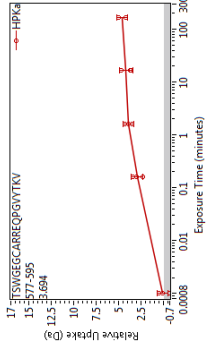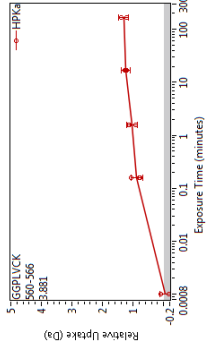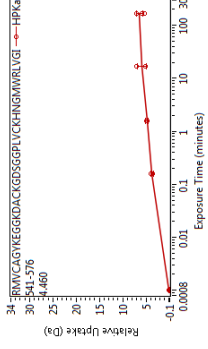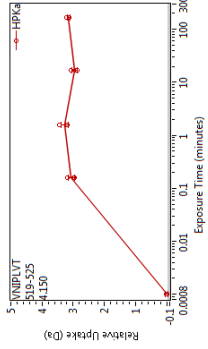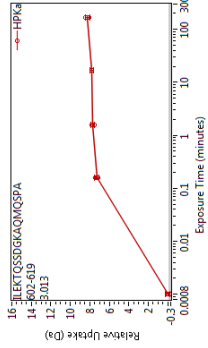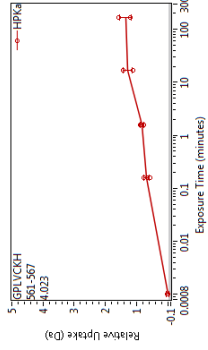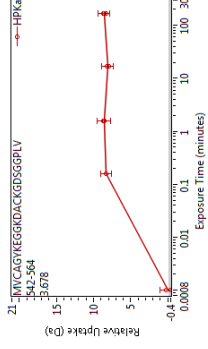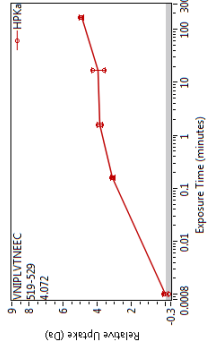

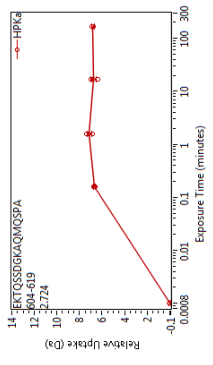

Supplement: JTH-17-759-s002.pdf [file JTH-17-759-s002.pdf]
